# Supplementary material
Source: PubMed Central journal article supplement (PMC4004585)
Supplement: NIHMS57307-supplement-1.pdf [file NIHMS57307-supplement-1.pdf]

**Gain-of-function mutations in *IFIH1* cause a spectrum of human disease phenotypes associated with upregulated type I interferon signaling**

Gillian I Rice<sup>1#</sup>, Yoandris del Toro Duany<sup>2,3#</sup>, Emma M Jenkinson<sup>1</sup>, Gabriella MA Forte<sup>1</sup>, Beverley H Anderson<sup>1</sup>, Giada Ariaudo<sup>4,5</sup>, Brigitte Bader-Meunier<sup>6</sup>, Eileen M Baildam<sup>7</sup>, Roberta Battini<sup>8</sup>, Michael W Beresford<sup>9</sup>, Manuela Casarano<sup>8</sup>, Mondher Chouchane<sup>10</sup>, Rolando Cimaz<sup>11</sup>, Abigail E Collins<sup>12</sup>, Nuno JV Cordeiro<sup>13</sup>, Russell C Dale<sup>14</sup>, Joyce E Davidson<sup>15</sup>, Liesbeth De Waele<sup>16</sup>, Isabelle Desguerre<sup>6</sup>, Laurence Faivre<sup>17</sup>, Elisa Fazzi<sup>18</sup>, Bertrand Isidor<sup>19</sup>, Lieven Lagae<sup>16</sup>, Andrew R Latchman<sup>20</sup>, Pierre Lebon<sup>21</sup>, Chumei Li<sup>22</sup>, John H Livingston<sup>23</sup>, Charles M Lourenço<sup>24</sup>, Maria Margherita Mancardi<sup>25</sup>, Alice Masurel-Paulet<sup>17</sup>, Iain B McInnes<sup>26</sup>, Manoj P Menezes<sup>27</sup>, Cyril Mignot<sup>28</sup>, James O'Sullivan<sup>1</sup>, Simona Orcesi<sup>4</sup>, Paolo P Picco<sup>29</sup>, Enrica Riva<sup>30</sup>, Robert A Robinson<sup>31</sup>, Diana Rodriguez<sup>32,33</sup>, Elisabetta Salvatici<sup>30</sup>, Christiaan Scott<sup>34</sup>, Marta Szybowska<sup>22</sup>, John L Tolmie<sup>35</sup>, Adeline Vanderver<sup>36</sup>, Catherine Vanhulle<sup>37</sup>, Jose Pedro Vieira<sup>38</sup>, Kate Webb<sup>34</sup>, Robyn N Whitney<sup>39</sup>, Simon G Williams<sup>1</sup>, Lynne A Wolfe<sup>40</sup>, Sameer M Zuberi<sup>41,42</sup>, Sun Hur<sup>2,3</sup>§\*, Yanick J Crow<sup>1</sup>§\*

<sup>1</sup>Manchester Academic Health Science Centre, University of Manchester, Genetic Medicine, Manchester, UK

<sup>2</sup>Department of Biological Chemistry and Molecular Pharmacology, Harvard Medical School, Boston, MA 02115, USA

<sup>3</sup>Boston Children's Hospital, Boston, MA 02115, USA

<sup>4</sup>Child Neurology and Psychiatry Unit, C. Mondino National Neurological Institute, Pavia, Italy

<sup>5</sup>Department of Brain and Behavioral Sciences, Unit of Child Neurology and Psychiatry, University of Pavia, Pavia, Italy

<sup>6</sup>Department of pediatric Immunology and Rheumatology, INSERM U 768, Imagine Foundation, APHP, Hôpital Necker, Paris, France

<sup>7</sup>Department of Paediatric Rheumatology, Alder Hey Children's NHS Foundation Trust, Liverpool, UK

<sup>8</sup>Department of Developmental Neuroscience, IRCCS Stella Maris, Pisa, Italy

<sup>9</sup>Institute of Translational Medicine, University of Liverpool; Department of Paediatric Rheumatology, Alder Hey Children's NHS Foundation Trust, Liverpool, UK

<sup>10</sup>Service de Pédiatrie 1, CHU de Dijon, Dijon, France

<sup>11</sup>AOU Meyer and University of Florence, Italy

<sup>12</sup>Department of Pediatrics, Division of Pediatric Neurology, University of Colorado, Denver, School of Medicine, USA

<sup>13</sup>Department of Paediatrics, Rainbow House NHS Ayrshire & Arran, Scotland, UK

<sup>14</sup>Neuroimmunology group, the Children's Hospital at Westmead, University of Sydney, Australia

<sup>15</sup>Department of Paediatric Rheumatology, Royal Hospital for Sick Children, Glasgow, UK

<sup>16</sup>Department of Development and Regeneration, KU Leuven, Paediatric Neurology, University Hospitals Leuven, Leuven, Belgium

<sup>17</sup>Centre de Génétique, Hôpital d'Enfants, CHU de Dijon et Université de Bourgogne, Dijon, France

<sup>18</sup>Child Neurology and Psychiatry Unit. Civil Hospital. Department of Clinical and Experimental Sciences, University of Brescia, Italy

<sup>19</sup>Service de Génétique Médicale, Inserm, CHU Nantes, UMR-S 957, Nantes, France

<sup>20</sup>Division of General Pediatrics, Department of Pediatrics, McMaster Children's Hospital, McMaster University, Hamilton, Canada

<sup>21</sup>Université et Faculté de Médecine Paris Descartes, Paris, France

<sup>22</sup>Department of Pediatrics, Clinical Genetics Program, McMaster Children's Hospital, McMaster University, Hamilton, Canada

<sup>23</sup>Department of Paediatric Neurology, Leeds Teaching Hospitals NHS Trust, Leeds, UK

<sup>24</sup>Clinics Hospital of Ribeirao Preto, University of São Paulo, Brasil

<sup>25</sup>Institute of Infection Immunity and Inflammation, University of Glasgow, Glasgow, UK

- <sup>26</sup>O.U. Child Neuropsychiatry, Department of Neuroscience, Giannina Gaslini Institute, Genoa, Italy
- <sup>27</sup>Institute for Neuroscience and Muscle Research, the Children's Hospital at Westmead, University of Sydney, Australia
- <sup>28</sup>AP-HP, Department of Genetics, Groupe Hospitalier Pitié Salpêtrière, F-75013, Paris, France
- <sup>29</sup>Paediatric Rheumatology, Giannina Gaslini Institute, Genoa, Italy
- <sup>30</sup>Clinical Department of Pediatrics, San Paolo Hospital, University of Milan, Italy
- <sup>31</sup>Department of Neurology, Great Ormond Street Hospital for Children, London, UK
- <sup>32</sup>AP-HP, Service de Neuropédiatrie & Centre de Référence de Neurogénétique, Hôpital A. Trousseau, HUEP, F-75012 Paris, France
- <sup>33</sup>UPMC Univ Paris 06, F-75012 Paris; Inserm U676, F-75019 Paris, France
- <sup>34</sup>University of Cape Town, Red Cross War Memorial Children's Hospital, Republic of South Africa
- <sup>35</sup>Department of Clinical Genetics, Southern General Hospital, Glasgow, Scotland, UK
- <sup>36</sup>Department of Paediatric Neurology, Children's National Medical Center, Washington DC, USA
- <sup>37</sup>Service de Néonatalogie et Réanimation, Hôpital Charles Nicolle, CHU Rouen, F-76031 Rouen, France
- <sup>38</sup>Neurology Department. Hospital Dona Estefânia, Centro Hospitalar de Lisboa Central, Portugal
- <sup>39</sup>Division of Pediatric Neurology, Department of Pediatrics, McMaster Children's Hospital, McMaster University, Hamilton, Canada
- <sup>40</sup>NIH Undiagnosed Diseases Program, Common Fund, Office of the Director, NIH, Bethesda, MD, USA
- <sup>41</sup>Paediatric Neurosciences Research Group, Fraser of Allander Neurosciences Unit, Royal Hospital for Sick Children, Glasgow, UK
- <sup>42</sup>School of Medicine, College of Medical, Veterinary & Life Sciences, University of Glasgow, UK

# These authors contributed equally to this work.

§ These authors jointly directed this work.

\* Corresponding authors: E-mail: yanickcrow@mac.com & Sun.Hur@childrens.harvard.edu

## Supplementary Materials

### Supplementary Note

**F102.** This male child was born to non-consanguineous European Italian parents with no family history of note. He was delivered at 34 weeks gestation by caesarean section indicated because of intrauterine growth retardation (birth weight 1.5 kg; head circumference 29 cm; length 29 cm). In the neonatal period he demonstrated congenital microcephaly, hepatosplenomegaly and thrombocytopenia. He was irritable and fed poorly in the first months of life, and was recognized to have profound developmental delay with spastic-dystonic tetraparesis. Cranial imaging at age 8 months revealed cerebral atrophy with basal ganglia calcifications and white matter disease. At the age of 12 months, interferon activity was recorded as 150 IU/ml and 25 IU/ml in the CSF and serum respectively. At 13 months of age he presented with seizures which were difficult to control. He was also recorded to have hypertension of unknown cause. Autoimmune screening (including ANA, ANCA and ENA antibody testing) at 22 months of age was negative. He died of pneumonia at the age of 2 years.

His phenotype is characteristic of Aicardi-Goutières syndrome (AGS).

**F163.** This male child was born to non-consanguineous European French parents with no family history of note. After an unremarkable pregnancy and delivery at 39 weeks gestation (birth weight 2.9 kg; head circumference 34 cm), he presented before the age of 1 month with irritability, feeding difficulties, axial hypotonia and abnormal limb posturing. Cranial CT and MRI scanning around the age of 2 years demonstrated cerebral and cerebellar atrophy with periventricular calcification and abnormal high T2 signal of the deep white matter. At age 52 months his CSF interferon activity was 37 IU/ml. Two months later the level was 25 IU/ml, with serum interferon activity recorded as 50 IU/ml. Further serum samples at the ages of 58 months and 8 years 6 months were 25 and 37 IU/ml respectively. At age 12 years he presented with generalized urticaria and associated oedema which was treated with steroids and antihistamines. Autoimmune investigations revealed only a mildly positive antinuclear factor. Now, at the age of 13 years, he demonstrates a severe quadriplegia, with no head control, no speech, abnormal ocular movements and microcephaly. He is fed by gastrostomy.

His phenotype is characteristic of AGS.

**F237.** This male child was born to non-consanguineous white North American parents with no family history of note. His development was considered normal until the age of 15 months, at which time he was riding a push car and had 6 - 10 words. After this point he developed intermittent posturing and rigidity of his legs, and then of the upper extremities. He also developed exaggerated startles which have persisted. He subsequently experienced a relentless loss of motor and intellectual skills, so that by age 24 months he was unable to sit unsupported and had lost the ability to swallow. Between 15 months and 4 years of age he demonstrated a fluctuating pattern of poor sleep, with persistent whining and crying. CSF neopterin was 4 x and 3 x the upper limit of normal at 2 years and 7 years of age respectively. Calcification of the basal ganglia and white matter were observed on cranial CT imaging at age 2 years, with abnormal high signal of the deep white matter seen on T2 weighted MRI. Extensive immunological testing at age 3 years was normal. Now, at the age of 12 years, he has no useful hand function, cannot sit independently and has limited words, although his understanding is relatively preserved.

His phenotype conforms to one of rapid onset of neuro-regression with spasticity and dystonia beginning at age 15 months.

**F259\_1.** This male child was born to non-consanguineous European Italian parents with no family history of note. After an unremarkable pregnancy and delivery at 40 weeks gestation (birth weight 3.1 kg; head circumference 34 cm), and an apparently normal early neonatal history, at age 6 months he was noted to demonstrate axial hypotonia and lower limb spasticity. Cranial CT scan at 2 years 6 months of age demonstrated cerebral and cerebellar atrophy with periventricular calcification. MRI at the same age revealed abnormal high T2 signal of the deep white matter. At age 31 months his CSF showed a normal white cell count, but a raised level of interferon activity (50 IU/ ml: serum level of <2IU/ml). He developed chilblains aged 6 years. Now, at the age of 8 years, he is severely delayed with a head circumference of 48 cm. He has never acquired the ability to sit, has minimal hand function (he will reach out for some objects), feeds via gastrostomy, and cannot communicate – although he can smile and cry when apparently content / upset. He has abnormal eye movements with nystagmus, but seems to have some useful vision. He demonstrates marked dystonic posturing of the limbs with axial hypotonia.

His phenotype is characteristic of AGS.

**F259\_2.** At the age of 48 years, the father of AGS259\_1 is completely asymptomatic with no recognized clinical signs. He has not undergone any neuro-imaging.

**F259\_3.** Up to the age of 79 years, the paternal grandmother of AGS259\_1 has remained healthy throughout her life apart from a squint recognized in infancy, and a left hip replacement for osteoarthritis at age 78 years. She has not undergone any neuro-imaging.

**F376.** This male child was born to non-consanguineous white British parents with no family history of note. He was delivered at 35 weeks gestation indicated because of significant oligohydramnios and intra-uterine growth retardation (birth weight 1.9 kg). The child was irritable, fed poorly, and experienced recurrent chest infections. Developmental delay was obvious by age 4 months, with central hypotonia, peripheral hypertonia and poor head growth. He presented at age 29 months with a 4 week history of recurring fevers, irritability, extensor spasms, developmental regression, weight loss and diarrhea. On examination, in addition to the preexisting neurological signs, he exhibited a florid ulcerative photosensitive vasculitic rash over the face and trunk, hepatosplenomegaly, generalized lymphadenopathy, and arthritis of the knees and ankles. He had serositis with pericardial effusion, a pronounced inflammatory response with raised ESR and CRP, haemolytic anaemia, and markedly abnormal autoantibody profile (ANA >1:640, dsDNA 1200 IU/ml, raised anti-cardiolipin antibodies, low complement C30.53, C4 0.11 g/l, and strongly positive pANCA). An infection and malignancy screen, including for HIV and hepatitis, was negative. At age 30 months his CSF interferon activity was 6 IU/L, with a serum level of 9 IU/L (normal <2). Cranial CT at the same age demonstrated gross cerebral atrophy with basal ganglia and white matter calcification, together with abnormal high signal in the periventricular and deep white matter on T2 weighted imaging. Treatment with a variety of immunosuppressive drugs (steroids, Cyclophosphamide, Infliximab, Rituximab, immunoglobulins and Azathioprine) was associated with an improvement in the quality of his social interactions, skin rash, lymphadenopathy, and blood indices. However, therapeutic weaning was impossible due recurrent flares, particularly of gastrointestinal vasculitis with rectal bleeds. He subsequently died at age 3 years 6 months after possible hemophagocytic lymphohistiocytosis with severe liver derangement (pancytopenia, ferritin of 3700, low fibrinogen).

His phenotype is characteristic of AGS associated with a severe lupus-like disease.

**F524\_1.** This female child was born to non-consanguineous white British parents. There was no other family history of note beyond the problems affecting her father (see below). She was delivered at term (birth weight 3 kg). Her motor development was delayed, so that at age 21 months she was only just able to maintain a stable sitting position, and she

demonstrated markedly increased tone in her legs. Intellectually she was considered to be normal. In light of her father's condition a working diagnosis of hereditary spastic paraparesis was suggested. At this point her MRI brain scan revealed non-specific high T2 signal in a periventricular distribution, with no atrophy. Spinal cord MRI was normal. After this time she became non-specifically unwell, with bouts of fever, irritability, vomiting, general lethargy and a suggestion of motor regression. A repeat MRI brain revealed obvious cerebral atrophy and accentuation of white matter changes. At age 3 years and 7 months, she suffered an episode of urinary retention and loss of upper limb function. She was treated empirically with steroids for a diagnosis of transverse myelitis confirmed on MRI which demonstrated the new appearance of increased T2 signal in her cervical and thoracic cord, leading to a diagnosis of transverse myelitis, and obvious cerebral atrophy. She was positive for Aquaporin 4, antinuclear (ANA) and anti dsDNA antibodies. Her CSF neopterin was 15 x the upper limit of normal with no increase in white cells. Further assessment identified evidence of a multisystem inflammatory process with a history of hair loss, marker bilateral palmar erythema, a livedo rash, raised ESR with normal CRP, mildly elevated transaminases, positive lupus anticoagulant and a raised urinary protein/creatinine ratio. She was diagnosed as having a lupus-like illness. She was treated with high dose immunosuppression (pulsed steroids followed by Rituximab) to which she had a marked positive response, and was subsequently maintained on oral prednisolone and mycophenolate mofetil. A repeat MRI brain showed some resolution of the atrophic changes associated with her deterioration. Now, at the age of 5 years, she can commando crawl across the floor but has not acquired the ability to walk independently. She demonstrates increased tone with spasticity in all 4 limbs and clawing of the hands. She has good understanding, but her speech remains dysarthric, and she is considered to have a degree of intellectual delay.

Her phenotype conforms to one of congenital lower-limb spasticity, with acute neurological deterioration beginning at age 3 years, and an associated lupus-like disease.

**F524\_2.** This male, the father of F524\_1, was born to non-consanguineous white British parents. The birth and perinatal period were uneventful, and he acquired all of his early milestones appropriately – sitting at age 6 months and walking independently at just under 1 year old. At age 2 years it was noted that he was toe-walking, and he started to fall more than previously. By the age of 3 years he had been given a diagnosis of cerebral palsy, and between the ages of 4 and 15 years he underwent multiple tendon lengthening operations. His disorder has been very slowly progressive, so that in his teens he was able to play as a goal-keeper for a local football team, whilst he can now only walk with the aid of sticks. At the age of 33 years he demonstrates significant lower limb spasticity, with no involvement of the upper limbs. He is cognitively fully intact, and has experienced no other problems with his health. At this time, he had a borderline positive ANA result (titre of 1 in 160), with normal anti-DNA, anti-Ro, La, Sm, RNP, Scl-70, Jo-1, centromere and ANCA antibody titres. Cardiolipin Ab (IgG) and (IgM), Rheumatoid Factor, ESR and CRP were also normal. He had a normal cranial and spinal MRI at age 29 years.

His phenotype conforms to one of childhood-onset lower-limb spasticity which has been very slowly progressive.

**F626.** This male child was born to non-consanguineous European Italian parents with no family history of note. He was delivered at term by elective caesarean section (birth weight 3.3 kg; head circumference 34 cm; length 52 cm). Initial concerns were raised at age 3 months because of poor feeding, for which he was admitted to hospital and noted to have a mild transaminitis. Microvesicular steatosis was seen on a liver biopsy taken at 1 year of age. Serological and infection-related investigations were consistently negative. Transaminase values gradually normalized by the age of 4 years. He sat at age 7 months, started to babble at age 8 - 9 months, and could walk with support by 1 year of age. At age 13 months he experienced a rapid loss of motor and intellectual skills over a period of 1

month resulting in severe spastic tetraparesis, axial hypotonia and a loss of speech. Cranial imaging undertaken at this time revealed non-specific subcortical areas of T2 high signal. These changes were still present on MRI at age 15 years, at which time low signal in the basal ganglia, subsequently confirmed as calcification on CT, was also seen. Of note, there was no brain atrophy. CSF neopterin has been consistently raised (5 – 10 x the upper limit of normal when measured on 8 occasions between the ages of 5 and 16 years). At 16 years of age he was admitted to hospital with a persistent fever, rash, and seizures. He was subsequently diagnosed with an inflammatory alveolitis in the absence of an obvious infectious agent, which responded to steroids. Extensive autoimmune testing was essentially normal apart from a single positive ANA antibody titre (1:80). At the age of 17 years his head circumference is between the 3<sup>rd</sup> - 10<sup>th</sup> centiles, with weight and height < 3<sup>rd</sup> centile. He demonstrates a spastic tetraplegia with mild dystonic movements in all 4 limbs. He feeds orally. Communication is limited to eye movements and he has no useful hand function.

His phenotype conforms to one of rapid onset of neuro-regression at age 13 months.

**F647.** This male child was born to non-consanguineous white Irish and Ukrainian parents with no family history of note. He was delivered at 34 weeks gestation by caesarean section indicated because of oligohydramnios. He was small for dates (birth weight 1.73 kg; head circumference 30 cm). He was noted to be anaemic at birth and demonstrated a severe thrombocytopenia. He subsequently received 19 platelet transfusions and 4 red cell transfusions over the first 6 weeks of life. Extensive investigations, including bone marrow biopsy, were non-contributory. Developmental delay was obvious by the age of 3 months, at which time he was exhibiting dystonic movements, limb hypertonia with axial hypotonia, and microcephaly. Following an episode of bloody diarrhoea at age 9 months, he was identified to have concentric hypertrophy of the left cardiac ventricle. Further investigations at this time for underlying mitochondrial disease, including liver and muscle biopsy, were normal (except for features of steatosis in the liver). At 10 months of age scrotal oedema was noted. Renal biopsy was consistent with focal glomerular sclerosis, with the presence of tubuloreticular inclusions also noted. He was diagnosed with acute nephrotic syndrome, and responded to a 3 month course of steroids. He was found to be possibly hypothyroid at 18 months of age and is now on replacement thyroxine therapy. At age 2 years, following a prodrome of vomiting with blood, he underwent endoscopy. Biopsy of the stomach demonstrated features consistent with atrophic gastritis. Cranial ultrasound at age 1 week revealed several small foci of hyperintensity indicative of calcification. Cranial MRI at this time was normal. However, repeat MRI at age 1 year demonstrated marked cerebral atrophy, delayed myelination, and calcification in the basal ganglia, white matter and cortex. Now, at the age of 2 years, he is severely developmentally delayed, with poor head control, no useful hand function and limited social interaction.

His phenotype is characteristic of AGS with marked bone marrow suppression in the neonatal period, hypertrophic cardiomyopathy, hypothyroidism and nephrotic syndrome.

## Supplementary Figures

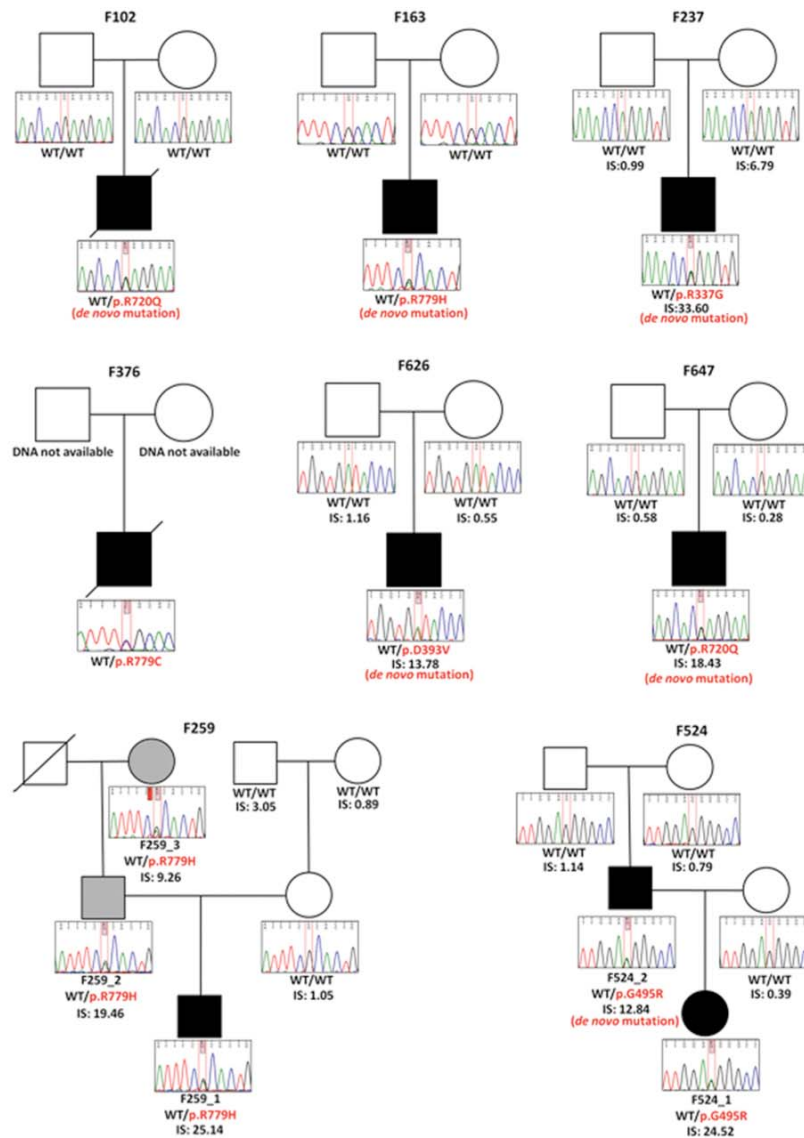

**Supplementary Figure 1. Families with mutations in *IFIH1*.** Family number is shown above each pedigree. Sequence chromatograms are given where available. *IFIH1* protein status is stated if known, with WT denoting wild-type. *De novo* mutations are annotated in brackets. Uncolored shapes represent unaffected individuals. Black filled shapes represent clinically affected individuals. Grey filled shapes represent clinically asymptomatic mutation-positive individuals. Diagonal line indicates deceased status. IS denotes interferon score (for participants with repeat samples, the mean combined measurement is given).

|                       | <b>R337G</b> | <b>D393V</b> | <b>G495R</b> |
|-----------------------|--------------|--------------|--------------|
| <i>H.Sapiens</i>      | GSGKTRVAVYI  | IGLSGDTQLKI  | SPGVGGATKQA  |
| <i>P.Troglodytes</i>  | GSGKTRVAVYI  | IGLSGDTQLKI  | SPGVGGATKQA  |
| <i>M.Mulatta</i>      | GSGKTRVAVYI  | IGLSGDTQLKI  | SPGVGGATKQA  |
| <i>R.Norvegicus</i>   | GSGKTRVAVYI  | IGLSGDTQLKI  | SPGVGAANKQS  |
| <i>M.musculus</i>     | GSGKTRVAVYI  | IGLSGDTQLKI  | SPGVGAANKQS  |
| <i>C.familiaris</i>   | GSGKTRVAVYI  | IGLSGDTQLKI  | SPGVRGAKRQA  |
| <i>B.taurus</i>       | GSGKTRVAVYI  | TRLSGDTQLKI  | SPGVGGAKKQA  |
| <i>G.gallus</i>       | GSGKTRVAVYI  | IGLSGDSELKI  | SPGVGGARSNS  |
| <i>X.Tropicalis</i>   | GSGKTRVAVYI  | TKISGDSQLKN  | SPGVGGAKNIK  |
| <i>T.nigroviridis</i> | GRGKTRVAVYV  | ERVSGDSQLKI  | SPGVGSATKMA  |
| <i>D.rerio</i>        | GSGKTRVAVFI  | ERVSGASQLKI  | SPGVGGAVSQQ  |
|                       | * *****:.    | :** ::**     | ****.*       |

  

|                       | <b>R720Q</b> | <b>R779E/R779C</b> |
|-----------------------|--------------|--------------------|
| <i>H.Sapiens</i>      | TEESARGIIFT  | VISKFRTGKIN        |
| <i>P.Troglodytes</i>  | TEESARGIIFT  | VISKFRTGKIN        |
| <i>M.Mulatta</i>      | TEESARGIIFT  | VISKFRTGKIN        |
| <i>R.Norvegicus</i>   | SEESSRGIIFT  | VISKFRTGEIN        |
| <i>M.musculus</i>     | SEESSRGIIFT  | VISKFRTGEIN        |
| <i>C.familiaris</i>   | TEEPARGIIFT  | VISKFRTGKIN        |
| <i>B.taurus</i>       | TEGSARGIIFT  | VISKFRTGKIN        |
| <i>G.gallus</i>       | TEE-PRGIIFT  | VIDKFRGGSIN        |
| <i>X.Tropicalis</i>   | NGQ-ARGIIFT  | IIHKFSTGELN        |
| <i>T.nigroviridis</i> | RLD-ARGIIFT  | VLNKFRNGEVN        |
| <i>D.rerio</i>        | REK-ARGIIFT  | VLKRFRTGEIN        |
|                       | *****        | :: :* *.*          |

**Supplementary Figure 2. CLUSTAL Omega alignment of IFIH1 homologues.** IFIH1 homologues were identified on Ensembl and aligned using CLUSTAL Omega. Amino acids altered by *IFIH1* mutations are highlighted by a red box. *H.Sapiens*: *Homo sapiens* (ENSP00000263642); *P.troglodytes*: *Pan troglodytes* (ENSPTRG00000012582); *M.mulatta*: *Macaca mulatta* (ENSMMUG00000003202); *R.Norvegicus*: *Rattus norvegicus* (ENSRNOG00000006227); *M.Musculus*: *Mus musculus* (ENSMUSG00000026896); *C.Familiaris*: *Canis familiaris* (ENSCAFG00000010438); *B.Taurus*: *Bos Taurus* (ENSBTAG00000008142); *G.gallus*: *Gallus gallus* (ENSGALG00000011089); *X.Tropicalis*: *Xenopus tropicalis* (ENSXETG00000013176); *T.nigroviridis*: *Tetraodon nigroviridis* (ENSTNIG00000016500); *D. Rerio*: *Danio rerio* (ENSDARG00000018553).

Homology to the human IFIH1 reference sequence (ENSP00000263642): Human: *P.troglodytes* 100%; Human: *M.mulatta* 98%; Human: *B.torus* 84%; Human: *C.familiaris* 83%; Human: *M.musculus* 80%; Human: *R.Norvegicus* 80%; Human: *G.Gallus* 56%; Human: *X.tropicalis* 55%; Human: *D.rerio* 49%; Human: *T.nigroviridis* 44%.





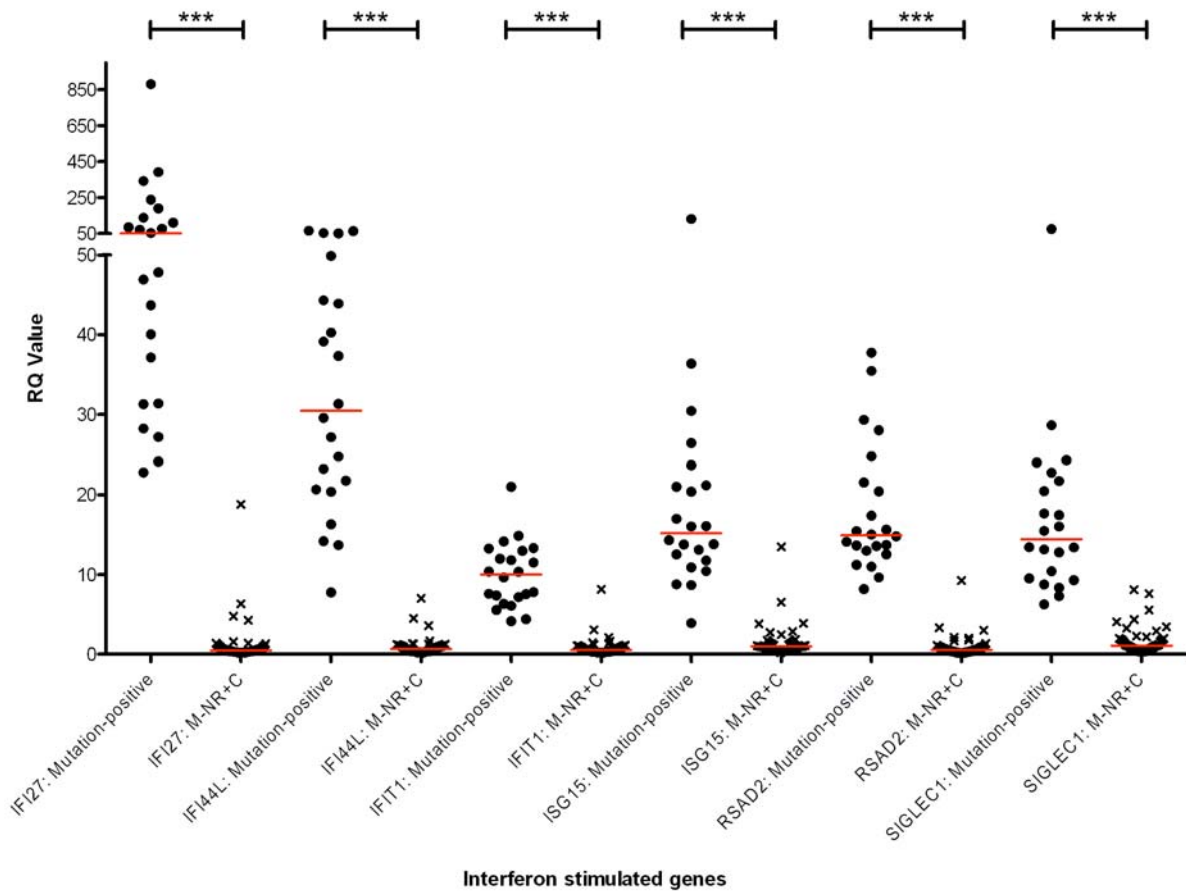

**Supplementary Figure 4. Individual interferon stimulated gene (ISG) transcript levels in *IFIH1* mutation-positive individuals, their *IFIH1* mutation-negative relatives, and a cohort of 29 controls.** Quantitative reverse transcription PCR of a panel of six ISGs in whole blood measured in five families with mutations in *IFIH1* and 29 healthy controls. RQ is equal to  $2^{-\Delta\Delta C_t}$ , with  $-\Delta\Delta C_t \pm$  standard deviations (i.e. the normalized fold change relative to a calibrator). Each value is derived from three technical replicates. For ease of presentation, mutation-negative relatives (n=13) have been combined with the control cohort (M-NR+C) in this figure. Horizontal red bars show the median RQ value for each probe in each group. For patients with repeat samples (biological replicates), all measurements are shown. Data analysed by one-way ANOVA using Dunnett's multiple comparison test. \*\*\* p<0.0001.

## Supplementary Tables

**Supplementary Table 1.** Summary statistics for exome sequencing.

|                                              | F102* | F163 HL§ |
|----------------------------------------------|-------|----------|
| Raw data (Gb)                                | 7.59  | 4.82     |
| Data mapped to target region (Gb)            | 5.22  | 2.70     |
| Percentage of bases with $\geq 1x$ coverage  | 99.9% | 97.2%    |
| Percentage of bases $\geq 10x$ coverage      | 99.2% | 86.8%    |
| Percentage of bases with $\geq 20x$ coverage | 97.4% | 74.9%    |
| Mean coverage                                | 97x   | 61x      |

\* HiSeq. § SOLiD 4. F259 sequence data were corrupted before summary data could be compiled.

**Supplementary Table 2.** Clinical data for *IFIH1* mutation-positive individuals.

| Family_Patient         | Sex | Consanguinity | Ancestry         | Amino acid alteration | Age at presentation | Clinical phenotype                                                                                                                                                                                                                                                                                                                     | Interferon score (age in decimalised years at sampling) | CSF white cell count* (age in months at sampling) | CSF IFN $\alpha$ § (age in months at sampling) | Serum IFN $\alpha$ § (age in months at sampling) | CSF pterins¶ (age in months at sampling)    | Cranial imaging |
|------------------------|-----|---------------|------------------|-----------------------|---------------------|----------------------------------------------------------------------------------------------------------------------------------------------------------------------------------------------------------------------------------------------------------------------------------------------------------------------------------------|---------------------------------------------------------|---------------------------------------------------|------------------------------------------------|--------------------------------------------------|---------------------------------------------|-----------------|
| F102                   | M   | No            | European Italian | R720Q                 | Neonatal            | IUGR, congenital microcephaly, hepatosplenomegaly and thrombocytopenia. Profound developmental delay with spastic-dystonic tetraparesis. Seizures and idiopathic hypertension at age 13mo. Died of pneumonia aged 2yr. Phenotype conforms to AGS                                                                                       | na                                                      | < 5 (12)                                          | 150 (12)                                       | 25 (12)                                          | na                                          | CA, C, WMD      |
| F163                   | M   | No            | European French  | R779H                 | Neonatal            | Neonatal irritability, feeding difficulties, axial hypotonia and abnormal limb posturing. Now, age 13yr, severe developmental delay. Phenotype conforms to AGS                                                                                                                                                                         | na                                                      | < 5 (11)                                          | 37 (52); 25 (54)                               | 50 (54); 25 (58); 37 (104)                       | na                                          | CA, C, WMD      |
| F237                   | M   | No            | White American   | R337G                 | 15mo                | Normal development until age 15mo. Loss of skills over a period of 12mo associated with fluctuating episodes of severe irritability. Now, age 12yr, cannot sit without support, no useful limb function and limited words. Intellect relatively preserved. Phenotype conforms to rapid onset of neuro-regression beginning at age 15mo | 12.3 (12.55); 34.2 (12.60)                              | nr                                                | na                                             | na                                               | Neo x4, Bio x1.5 (24); Neo x3, Bio 1.1 (84) | CA, C, WMD      |
| F259_1 (son of F259_2) | M   | No            | European Italian | R779H                 | < 6mo               | Axial hypotonia and lower limb spasticity noted at age 6mo. Now, age 8yr, profound physical and intellectual delay, having never acquired the ability to sit, and only smiling and crying when apparently content / upset. Marked                                                                                                      | 19.2 (8.14); 35.9 (8.21); 26.7 (8.29)                   | < 5 (31)                                          | 50 (31)                                        | <2 (31)                                          | na                                          | CA, C, WMD      |

|                                         |   |    |                  |       |              |                                                                                                                                                                                                                                                                                                                                                        |                                                                      |          |        |        |              |                                  |
|-----------------------------------------|---|----|------------------|-------|--------------|--------------------------------------------------------------------------------------------------------------------------------------------------------------------------------------------------------------------------------------------------------------------------------------------------------------------------------------------------------|----------------------------------------------------------------------|----------|--------|--------|--------------|----------------------------------|
| F259_2 (father of F259_1)               | M | No | European Italian | R779H | Asymptomatic | dystonic posturing of the limbs with axial hypotonia. Phenotype conforms to AGS Asymptomatic at age 48yr                                                                                                                                                                                                                                               | 10.8 (48.80); 17.0 (48.87); 29.1 (48.95)                             | na       | na     | na     | na           | na                               |
| F259_3 (paternal grandmother of F259_1) | F | No | European Italian | R779H | Asymptomatic | Asymptomatic at age 79yr                                                                                                                                                                                                                                                                                                                               | 12.3 (79.33); 7.02 (79.41)                                           | na       | na     | na     | na           | na                               |
| F376                                    | M | No | White British    | R779C |              | Neonatal irritability, feeding difficulties, axial hypotonia and abnormal limb tone evolving to severe global delay. Florid presentation of inflammatory process at age 29mo; continued disease despite treatment with high dose immunosuppressives. Died age 3yr. Phenotype conforms to AGS with superadded lupus-like disease                        | na                                                                   | < 5 (30) | 6 (30) | 9 (30) | na           | CA, C, WMD                       |
| F524_1 (daughter of F524_2)             | F | No | White British    | G495R | < 7mo        | Early-onset spastic paraparesis with episode of sub-acute neurological deterioration accompanied by abnormal immunological profile age 3yr. Now, age 5yr, has significant 4 limb involvement and some intellectual delay. Phenotype is of congenital lower-limb spasticity with acute neurological deterioration with an associated lupus-like disease | 20.1 (3.91); 25.4 (5.19)                                             | < 5 (42) | na     | na     | Neo x15 (43) | CA, WMD, spinal cord involvement |
| F524_2 (father of F524_1)               | M | No | White British    | G495R | < 24mo       | Diagnosed with 'cerebral palsy' as an infant. Thereafter, very slowly progressive spastic paraplegia involving the lower limbs. Now, age 33yr, has no other features. Phenotype conforms to one of childhood-onset lower-limb spasticity which has been very                                                                                           | 15.2 (32.34); 11.5 (32.85); 17.8 (33.13); 29.3 (33.62); 10.0 (33.95) | na       | na     | na     | na           | Normal at age 29y                |

|      |   |    |                              |       |          |                                                                                                                                                                                                                                                                                                                                                                                                                                                               |                                             |          |    |                                                |                  |
|------|---|----|------------------------------|-------|----------|---------------------------------------------------------------------------------------------------------------------------------------------------------------------------------------------------------------------------------------------------------------------------------------------------------------------------------------------------------------------------------------------------------------------------------------------------------------|---------------------------------------------|----------|----|------------------------------------------------|------------------|
| F626 | M | No | European Italian             | D393V | 13mo     | slowly progressive<br>Normal development until age 13mo. Rapid loss of skills over a 1mo period resulting in spastic tetraparesis and axial hypotonia. Recent episode of fever, seizures and alveolitis responding to steroids. Now, age 17yr, severe developmental delay. Phenotype conforms to rapid onset of neuro-regression beginning at age 13mo                                                                                                        | 12.4 (17.14);<br>15.6 (17.66)               | < 5 (72) | na | Neo x5-10, Bio normal (8 times between 72-192) | No CA, C and WMD |
| F647 | M | No | Mixed white Irish / Ukranian | R720Q | Neonatal | IUGR. Severe neonatal thrombocytopenia and anaemia. Developmental delay evident by 5mo. FTT obvious by age 7mo, at which point diagnosed with HOCM and hypertension. Nephrotic syndrome diagnosed at age 10mo. Possible hypothyroidism and atrophic gastritis diagnosed at ages 18mo and 2yr respectively. Now, age 2yr, severe delay. Phenotype conforms to AGS with early, reversible, bone marrow suppression, HOCM, hypothyroidism and nephrotic syndrome | 22.0 (1.39);<br>16.1 (1.96);<br>18.4 (2.06) | nr       | na | na                                             | CA, C, WMD       |

M, male; F, female; yr, years; mo, months; na, not analysed; nr, not recorded; CSF, cerebrospinal fluid; IFN $\alpha$ , interferon alpha; AGS, Aicardi-Goutières syndrome; IUGR, intrauterine growth retardation; Neo, neopterin; Bio, biopterin; CA, cerebral atrophy; C, calcification; WMD, white matter disease; HOCM, hypertrophic cardiomyopathy; FTT, failure to thrive. \* Cells/mm<sup>3</sup> (Abnormal>5 cells/mm<sup>3</sup>). § IU/ml (Abnormal >2 IU/ml). ¶ Values of neopterin (Neo) and biopterin (Bio) given as multiples of upper limit of normal in laboratory where sample(s) tested.

**Supplementary Table 3.** Summary data of *IFIH1* mutation-negative patients / families demonstrating a positive interferon score.

| <b>Family number</b> | <b>Phenotype</b>           | <b>Decimalised age at time of sampling, interferon score</b> |
|----------------------|----------------------------|--------------------------------------------------------------|
| F125                 | AGS                        | 8.39, 25.04                                                  |
| F218                 | AGS                        | 6.58, 5.61                                                   |
| F306                 | AGS                        | 7.08, 9.44                                                   |
| F472                 | Undefined interferonopathy | 12.37, 5.50                                                  |
| F473                 | AGS                        | 5.07, 10.87                                                  |
| F492                 | Undefined interferonopathy | 3.62, 8.13; 4.10, 8.01                                       |
| F501                 | Lupus-like                 | 4.86, 11.00                                                  |
| F520_1               | AGS                        | 8.69, 22.42; 9.04, 7.40                                      |
| F520_2               | AGS                        | 4.48, 9.80; 4.83, 7.27                                       |
| F520_3               | AGS                        | 1.73, 9.91; 2.08, 10.11                                      |
| F554                 | Undefined interferonopathy | 1.23, 6.22                                                   |
| F561                 | Undefined interferonopathy | 17.48, 8.40                                                  |
| F571                 | Lupus-like                 | 7.03, 14.42                                                  |
| F584                 | AGS                        | 5.33, 8.28                                                   |
| F588                 | Undefined interferonopathy | 2.81, 3.80                                                   |
| F636                 | Undefined interferonopathy | 15.27, 46.52                                                 |
| F670                 | Undefined interferonopathy | 5.31, 39.10                                                  |
| F677                 | Undefined interferonopathy | 14.95, 10.35; 15.33, 6.27                                    |
| F693                 | Undefined interferonopathy | 2.59, 6.51                                                   |
| F694_1               | Undefined interferonopathy | 7.77; 36.48                                                  |
| F694_2               | Undefined interferonopathy | 2.57, 10.24; 2.81, 11.55                                     |
| F721                 | Undefined interferonopathy | 7.45, 7.76                                                   |
| F722                 | Undefined interferonopathy | 5.77, 7.52                                                   |

**Supplementary Table 4.** Results of SIFT, PolyPhen2 and MutationTaster analysis of the effects of the amino acid substitutions observed in *IFIH1* mutation-positive patients.

| cDNA      | Genomic DNA<br>Chr2 (GRCh37) | Protein     | SIFT                   | PolyPhen2               | MutationTaster                   |
|-----------|------------------------------|-------------|------------------------|-------------------------|----------------------------------|
| c.1009A>G | g.163144731T>C               | p.Arg337Gly | Tolerated score 0.12   | Probably damaging 1.0   | Disease causing (p-value: 1.0)   |
| c.1178A>T | g.163139004T>A               | p.Asp393Val | Deleterious score 0.01 | Probably damaging 0.998 | Disease causing (p-value: 1.0)   |
| c.1483G>A | g.163137879C>T               | p.Gly495Arg | Deleterious score 0.01 | Probably damaging 0.982 | Disease causing (p-value: 0.954) |
| c.2159G>A | g.163133342C>T               | p.Arg720Gln | Deleterious score 0    | Probably damaging 0.992 | Disease causing (p-value: 1.0)   |
| c.2335C>T | g.163130424G>A               | p.Arg779Cys | Deleterious score 0.01 | Probably damaging 1.0   | Disease causing (p-value: 1.0)   |
| c.2336G>A | g.163130423C>T               | p.Arg779His | Tolerated score 0.05   | Probably damaging 0.994 | Disease causing (p-value: 1.0)   |

SIFT: [http://sift.jcvi.org/www/SIFT\\_enst\\_submit.html](http://sift.jcvi.org/www/SIFT_enst_submit.html)

PolyPhen2: <http://genetics.bwh.harvard.edu/pph2/>

Mutation Taster: <http://www.mutationtaster.org/>

SIFT scores range from 0 to 1. The amino acid change is predicted to be damaging if the score is  $\leq 0.05$ , and tolerated if the score is  $> 0.05$

Polyphen2 qualitative ternary classification appraised at 5%/10% (HumDiv) or 10%/20% (HumVar) FPR thresholds ("Benign", "Possibly damaging", "Probably damaging")

MutationTaster p value is the probability of the prediction, i.e. a value close to 1 indicates a high 'security' of the prediction



**Supplementary Table 5.** Microsatellite genotypes in child-parent trios with *de novo* mutations in *IFIH1*.

| Marker        | Sample          | Allele 1 | Allele 2 |
|---------------|-----------------|----------|----------|
| D3S3640       | F102 Mother     | 132      | 132      |
|               | F102 Father     | 128      | 132      |
|               | F102 Affected   | 128      | 132      |
|               | F524_2 Mother   | 130      | 134      |
|               | F524_2 Father   | 132      | 136      |
|               | F524_2 Affected | 130      | 132      |
|               | F647 Mother     | 136      | 138      |
|               | F647 Father     | 132      | 134      |
|               | F647 Affected   | 132      | 138      |
|               | F626 Mother     | 132      | 132      |
|               | F626 Father     | 130      | 132      |
|               | F626 Affected   | 132      | 132      |
|               | F237 Mother     | 132      | 132      |
|               | F237 Father     | 128      | 132      |
|               | F237 Affected   | 132      | 132      |
|               | F163 Mother     | 132      | 134      |
|               | F163 Father     | 132      | 134      |
| F163 Affected | 132             | 134      |          |
| Control       | 128             | 132      |          |
| D3S3560       | F102 Mother     | 180      | 180      |
|               | F102 Father     | 180      | 180      |
|               | F102 Affected   | 180      | 180      |
|               | F524_2 Mother   | 178      | 182      |
|               | F524_2 Father   | 180      | 180      |
|               | F524_2 Affected | 178      | 180      |
|               | F647 Mother     | 180      | 180      |
|               | F647 Father     | 180      | 180      |
|               | F647 Affected   | 180      | 180      |
|               | F626 Mother     | 180      | 180      |
|               | F626 Father     | 182      | 182      |
|               | F626 Affected   | 180      | 182      |
|               | F237 Mother     | 180      | 180      |
|               | F237 Father     | 178      | 180      |
|               | F237 Affected   | 180      | 180      |
|               | F163 Mother     | 180      | 180      |
|               | F163 Father     | 180      | 182      |
| F163 Affected | 180             | 182      |          |
| Control       | 180             | 182      |          |
| D11S4205      | F102 Mother     | 194      | 194      |
|               | F102 Father     | 194      | 194      |
|               | F102 Affected   | 194      | 194      |
|               | F524_2 Mother   | 194      | 198      |
|               | F524_2 Father   | 194      | 194      |
|               | F524_2 Affected | 194      | 198      |
|               | F647 Mother     | 194      | 194      |
|               | F647 Father     | 194      | 194      |
|               | F647 Affected   | 194      | 194      |

|          |                 |     |     |
|----------|-----------------|-----|-----|
|          | F626 Mother     | 194 | 194 |
|          | F626 Father     | 194 | 198 |
|          | F626 Affected   | 194 | 194 |
|          | F237 Mother     | 192 | 198 |
|          | F237 Father     | 194 | 196 |
|          | F237 Affected   | 196 | 198 |
|          | F163 Mother     | 194 | 194 |
|          | F163 Father     | 194 | 194 |
|          | F163 Affected   | 194 | 194 |
|          | Control         | 194 | 196 |
| D11S913  | F102 Mother     | 216 | 216 |
|          | F102 Father     | 220 | 220 |
|          | F102 Affected   | 216 | 220 |
|          | F524_2 Mother   | 216 | 218 |
|          | F524_2 Father   | 216 | 220 |
|          | F524_2 Affected | 216 | 216 |
|          | F647 Mother     | 218 | 218 |
|          | F647 Father     | 216 | 216 |
|          | F647 Affected   | 216 | 218 |
|          | F626 Mother     | 218 | 218 |
|          | F626 Father     | 216 | 218 |
|          | F626 Affected   | 218 | 218 |
|          | F237 Mother     | 220 | 220 |
|          | F237 Father     | 216 | 220 |
|          | F237 Affected   | 216 | 220 |
|          | F163 Mother     | 218 | 220 |
|          | F163 Father     | 218 | 220 |
|          | F163 Affected   | 218 | 220 |
|          | Control         | 216 | 218 |
| D11S987  | F102 Mother     | 192 | 198 |
|          | F102 Father     | 196 | 196 |
|          | F102 Affected   | 196 | 198 |
|          | F524_2 Mother   | 198 | 200 |
|          | F524_2 Father   | 190 | 198 |
|          | F524_2 Affected | 190 | 200 |
|          | F647 Mother     | 196 | 196 |
|          | F647 Father     | 180 | 196 |
|          | F647 Affected   | 180 | 196 |
|          | F626 Mother     | 194 | 196 |
|          | F626 Father     | 194 | 196 |
|          | F626 Affected   | 196 | 196 |
|          | F237 Mother     | 194 | 196 |
|          | F237 Father     | 192 | 200 |
|          | F237 Affected   | 192 | 196 |
|          | F163 Mother     | 192 | 198 |
|          | F163 Father     | 196 | 202 |
|          | F163 Affected   | 196 | 198 |
|          | Control         | 186 | 196 |
| D11S1889 | F102 Mother     | 233 | 235 |
|          | F102 Father     | 233 | 235 |
|          | F102 Affected   | 233 | 233 |

|         |                 |     |     |
|---------|-----------------|-----|-----|
|         | F524_2 Mother   | 229 | 235 |
|         | F524_2 Father   | 227 | 233 |
|         | F524_2 Affected | 227 | 229 |
|         | F647 Mother     | 235 | 237 |
|         | F647 Father     | 225 | 233 |
|         | F647 Affected   | 225 | 237 |
|         | F626 Mother     | 229 | 237 |
|         | F626 Father     | 229 | 245 |
|         | F626 Affected   | 229 | 245 |
|         | F237 Mother     | 237 | 237 |
|         | F237 Father     | 229 | 235 |
|         | F237 Affected   | 229 | 237 |
|         | F163 Mother     | 235 | 237 |
|         | F163 Father     | 227 | 233 |
|         | F163 Affected   | 233 | 235 |
|         | Control         | 233 | 235 |
| D20S847 | F102 Mother     | 129 | 129 |
|         | F102 Father     | 129 | 129 |
|         | F102 Affected   | 129 | 129 |
|         | F524_2 Mother   | 133 | 137 |
|         | F524_2 Father   | 133 | 137 |
|         | F524_2 Affected | 137 | 137 |
|         | F647 Mother     | 129 | 129 |
|         | F647 Father     | 129 | 137 |
|         | F647 Affected   | 129 | 129 |
|         | F626 Mother     | 129 | 129 |
|         | F626 Father     | 129 | 133 |
|         | F626 Affected   | 129 | 129 |
|         | F237 Mother     | 129 | 137 |
|         | F237 Father     | 129 | 135 |
|         | F237 Affected   | 129 | 129 |
|         | F163 Mother     | 127 | 129 |
|         | F163 Father     | 137 | 137 |
|         | F163 Affected   | 129 | 137 |
|         | Control         | 129 | 131 |
| D20S896 | F102 Mother     | 187 | 187 |
|         | F102 Father     | 189 | 189 |
|         | F102 Affected   | 187 | 189 |
|         | F524_2 Mother   | 187 | 189 |
|         | F524_2 Father   | 187 | 193 |
|         | F524_2 Affected | 189 | 193 |
|         | F647 Mother     | 185 | 197 |
|         | F647 Father     | 187 | 189 |
|         | F647 Affected   | 185 | 187 |
|         | F626 Mother     | 187 | 187 |
|         | F626 Father     | 187 | 195 |
|         | F626 Affected   | 187 | 187 |
|         | F237 Mother     | 189 | 193 |
|         | F237 Father     | 185 | 189 |
|         | F237 Affected   | 189 | 193 |
|         | F163 Mother     | 189 | 193 |

|         |                 |     |     |
|---------|-----------------|-----|-----|
|         | F163 Father     | 189 | 189 |
|         | F163 Affected   | 189 | 189 |
|         | Control         | 187 | 189 |
| D20S843 | F102 Mother     | 256 | 260 |
|         | F102 Father     | 248 | 252 |
|         | F102 Affected   | 252 | 256 |
|         | F524_2 Mother   | 252 | 256 |
|         | F524_2 Father   | 252 | 256 |
|         | F524_2 Affected | 256 | 256 |
|         | F647 Mother     | 256 | 256 |
|         | F647 Father     | 254 | 264 |
|         | F647 Affected   | 256 | 264 |
|         | F626 Mother     | 254 | 256 |
|         | F626 Father     | 250 | 252 |
|         | F626 Affected   | 252 | 256 |
|         | F237 Mother     | 252 | 262 |
|         | F237 Father     | 254 | 256 |
|         | F237 Affected   | 252 | 256 |
|         | F163 Mother     | 252 | 256 |
|         | F163 Father     | 250 | 252 |
|         | F163 Affected   | 250 | 256 |
|         | Control         | 250 | 256 |

**Supplementary Table 6.** *IFIH1* variants protective against the development of type 1 diabetes as described by Nejentsev *et al.* <sup>1</sup>

| rs ID      | Variant           | EVS* allele frequency |
|------------|-------------------|-----------------------|
| rs35337543 | c.1641+1G>C       | 106/12900             |
| rs35732034 | c.2807+1G>A       | 70/12936              |
| rs35744605 | c.1879G>T p.E627* | 52/12954              |
| rs35667974 | c.2767A>G p.I923V | 151/12855             |

\* Exome Variant Server (<http://evs.gs.washington.edu/EVS/>)

1. Nejentsev, S. et al. Rare variants of *IFIH1*, a gene implicated in antiviral responses, protect against type 1 diabetes. *Science* **324**, 387-9 (2009).

**Supplementary Table 7.** Primers used to amplify *IFIH1* exons (including intron / exon boundaries).

| <b>Exon</b> | <b>Primer name</b> | <b>Sequence</b>             |
|-------------|--------------------|-----------------------------|
| Exon 1      | IFIH1_Ex1F         | ACAACAGCACCATCTGCTTG        |
|             | IFIH1_Ex1R         | GCCTAAAAGGCTAGCTCCA         |
| Exon 2      | IFIH1_Ex2F         | AAAGGGTATTTCTGTTTAAGGTT     |
|             | IFIH1_Ex2R         | TGAATTCTCAATCACTAGGCAGA     |
| Exon 3      | IFIH1_Ex3F         | TGGCACTATGATTTGCATTCT       |
|             | IFIH1_Ex3R         | TCTGCCAGTTGGTTTTTCT         |
| Exon 4      | IFIH1_Ex4F         | TGTGCTGTAGAGGTGTGCAGT       |
|             | IFIH1_Ex4R         | TGCTTCCACTATATGGCGTCT       |
| Exon 5      | IFIH1_Ex5F         | GGCCTACGTTTCAGTTTCAGG       |
|             | IFIH1_Ex5R         | CAATGACACAAATGCCATCA        |
| Exon 6      | IFIH1_Ex6F         | TTCATGCTGGATGCCAAAC         |
|             | IFIH1_Ex6R         | TTTCTCCAGGAAGTAGAAGGA       |
| Exon 7      | IFIH1_Ex7F         | CCCAAGGCAGCTCAATTACT        |
|             | IFIH1_Ex7R         | CCAAGAAGTCCTGGCATTG         |
| Exon 8      | IFIH1_Ex8F         | CGTTGAATAAAGTGAAAGGGAAA     |
|             | IFIH1_Ex8R         | AGCCTTTGCCATCTTTCTACTG      |
| Exon 9      | IFIH1_Ex9F         | GCTTGATGGCAGGCTTAAAA        |
|             | IFIH1_Ex9R         | TGGGGAATCTGTGATATAGTCATCT   |
| Exon 10     | IFIH1_Ex10F        | GGCACAATTTTAGGGGGTTT        |
|             | IFIH1_Ex10R        | TGAAAAGGTAAATGAATGACACCA    |
| Exon 11     | IFIH1_Ex11F        | AACTGTATATTTTTGGTGTACAAAATG |
|             | IFIH1_Ex11R        | TGATCATGCCACTGCTCTTC        |
| Exon 12     | IFIH1_Ex12F        | GATTTTAATGTGTTTAGCATCACAAA  |
|             | IFIH1_Ex12R        | GCAATTAATAATAGGAACACAACAAA  |
| Exon 13     | IFIH1_Ex13F        | TGAAGACTGGCATGCTGAAC        |
|             | IFIH1_Ex13R        | TCAGCACAATTTTTGTCTGGAG      |
| Exon 14     | IFIH1_Ex14F        | CAGGAGATGATTATATACCAAATTCTT |
|             | IFIH1_Ex14R        | TGAGAGGCTAAAGGAGAGGAA       |
| Exon 15_16  | IFIH1_Ex15_16F     | GGAAGGAATGCCGTGTAGAA        |
|             | IFIH1_Ex15_16R     | TCCTTACCTCTGCCCAACAA        |
